# Supplementary material for: Genome-wide scan reveals genetic divergence and diverse adaptive selection in Chinese local cattle
Source: BMC Genomics. 2019 Jun 14;20:494. doi: 10.1186/s12864-019-5822-y (PMC6570941; doi:10.1186/s12864-019-5822-y)
Supplement: Supplementary file 2 — Table S2. Candidate selective signature and genes under positive Selection using di approach for four groups including North, Northwest, South and Southwest. (XLSX 31 kb) [file 12864_2019_5822_MOESM2_ESM.xlsx]

## Sheet: Sheet1
CHR	START	END	Lenth	GROUP	COUNT	GENE
chr1	83527049	83862517	335468	south	1	ABCC5,ABCF3,ALG3,AP2M1,CAMK2N2,ECE2,HTR3C,MIR1224,PARL
chr1	86503081	86769263	266182	north	1	DNAJC19,FXR1
chr1	116967860	117296365	328505	southwest;south	2	AADAC
chr1	135697870	135990058	292188	south	1	ANAPC13
chr1	138916196	139159980	243784	northwest	1	NOT_FOUND
chr1	146627596	146808972	181376	northwest;southwest	2	AGPAT3,TRAPPC10
chr1	149637438	149904654	267216	northwest;southwest;south	3	NOT_FOUND
chr1	149912106	150141293	229187	northwest;south	2	CBR1,MGC127133,SETD4
chr2	34968990	35258195	289205	southwest	1	PSMD14,TANK,TBR1
chr2	47386708	47563072	176364	south	1	EPC2,KIF5C,MIR2354
chr2	61708027	61837631	129604	south	1	DARS,MCM6
chr2	89110302	89242687	132385	south	1	NOT_FOUND
chr2	120342384	120616043	273659	southwest;south	2	DIS3L2,NPPC
chr2	125245355	125502227	256872	north;northwest;southwest;south	4	GMEB1,OPRD1,RCC1,SNHG12,SNHG3,TAF12,TRNAU1AP,YTHDF2
chr2	125508429	125733775	225346	north;northwest;southwest;south	4	ATPIF1,MED18,PHACTR4,SESN2
chr2	126079431	126252390	172959	northwest	1	FAM76A,IFI6,PPP1R8,STX12
chr2	126262898	126548259	285361	north;northwest;southwest;south	4	AHDC1,CD164L2,FGR,MAP3K6,TMEM222,WASF2
chr2	126564530	126769618	205088	northwest;southwest	2	SLC9A1,WDTC1
chr2	134009961	134216631	206670	south	1	UBR4
chr3	9113010	9461404	348394	northwest	1	NCSTN,SLAMF1,SLAMF6,VANGL2
chr3	19585241	19817321	232080	north	1	BNIPL,C3H1orf56,CDC42SE1,FAM63A,GABPB2,LYSMD1,MLLT11,PIP5K1A,PRUNE,PSMD4,SCNM1,TMOD4,TNFAIP8L2,VPS72
chr3	92478834	92712038	233204	south	1	CYB5RL,MRPL37,SSBP3,TCEANC2
chr3	99409021	99679660	270639	north	1	CMPK1,FOXE3,PDZK1IP1,STIL,TAL1
chr3	105536719	105790854	254135	south	1	SCMH1
chr4	12171943	12380979	209036	north	1	PPP1R9A
chr4	12384488	12597319	212831	north	1	PON1,PON2,PON3
chr4	45173410	45457989	284579	north	1	RELN
chr4	54272541	54593391	320850	north;south	2	FOXP2
chr4	57152485	57311989	159504	north	1	NOT_FOUND
chr4	70206515	70357035	150520	northwest;southwest;south	3	HNRNPA2B1,NFE2L3
chr4	70358096	70508946	150850	southwest;south	2	MIR148A
chr4	79732757	79918564	185807	south	1	NOT_FOUND
chr4	120117706	120327618	209912	northwest	1	NCAPG2
chr5	15813743	15954308	140565	northwest	1	MGAT4C
chr5	24898322	25102148	203826	north	1	NR2C1
chr5	25973010	26242540	269530	north;northwest;southwest;south	4	HOXC11,HOXC12,HOXC4,HOXC5,MIR196A-2,MIR615,SMUG1
chr5	26245360	26459369	214009	north	1	HOXC13
chr5	32252995	32487763	234768	northwest	1	ASB8,CCDC184,COL2A1,PFKM,SENP1,TMEM106C
chr5	47493578	47719305	225727	north	1	HELB
chr5	48563017	48833337	270320	north;northwest;southwest;south	4	LEMD3
chr5	48838857	49040943	202086	north;northwest;southwest;south	4	LEMD3,MIR2429,WIF1
chr5	49043539	49197324	153785	northwest	1	NOT_FOUND
chr5	49201226	49431301	230075	southwest	1	GNS,RASSF3
chr5	56500702	56792337	291635	southwest	1	GPR182,MIR2431,MYO1A,NAB2,NDUFA4L2,NEMP1,R3HDM2,SHMT2,STAC3,STAT6,TAC3
chr5	57131678	57487872	356194	north;northwest;southwest;south	4	ANKRD52,APOF,ApoN,BAZ2A,CNPY2,COQ10A,CS,GLS2,IL23A,MIP,MIR2432,MIR2433,MYL6,NABP2,PAN2,RBMS2,RNF41,SLC39A5,SMARCC2,SPRYD4,STAT2,TIMELESS
chr5	57490826	57729851	239025	northwest;southwest;south	3	CDK2,DGKA,ERBB3,ESYT1,IKZF4,MYL6B,PA2G4,PMEL,RAB5B,RPS26,SUOX,WIBG,ZC3H10
chr5	57736703	57966447	229744	northwest;southwest;south	3	BLOC1S1,CD63,DNAJC14,ITGA7,LOC507581,MMP19,ORMDL2,RDH5,SARNP
chr5	60724013	61023868	299855	northwest;southwest	2	ELK3
chr5	66146757	66435441	288684	south	1	CCDC53,NUP37,PMCH
chr5	74240663	74457643	216980	south	1	RBFOX2
chr5	74462032	74870375	408343	south	1	LOC515697,RBFOX2
chr5	91494429	91732896	238467	south	1	NOT_FOUND
chr5	95662194	95854075	191881	south	1	ATF7IP,GUCY2C,PLBD1
chr5	107163663	107275804	112141	southwest	1	NOT_FOUND
chr5	108743048	108994829	251781	northwest;southwest;south	3	DCP1B
chr5	111678462	111858987	180525	northwest	1	ENTHD1,GRAP2
chr6	30742238	30913633	171395	northwest	1	BMPR1B
chr6	38917456	39220461	303005	north	1	LCORL
chr6	47302530	47543802	241272	southwest;south	2	CCKAR,RBPJ
chr7	4529302	4762339	233037	northwest;southwest	2	C7H19orf60,ELL,FKBP8,GDF15,ISYNA1,KXD1,LRRC25,PGPEP1,SSBP4,UBA52
chr7	17072132	17330857	258725	northwest;southwest;south	3	ACP5,CNN1,ECSIT,ELOF1,LOC508834,LOC522449
chr7	20071025	20269601	198576	north	1	NOT_FOUND
chr7	20931482	21126850	195368	north	1	CCDC94,CREB3L3,EBI3,FSD1,SH3GL1,SHD,SIRT6,STAP2
chr7	44809660	45060279	250619	north;northwest;southwest;south	4	BSG,CFD,ELANE,FGF22,FSTL3,MISP,POLRMT,PRSS57,PTBP1,R3HDM4,RNF126
chr7	45062780	45354060	291280	north;northwest;southwest;south	4	ABCA7,ARID3A,ATP5D,CNN2,EFNA2,GPX4,HMHA1,POLR2E,R3HDM4,SBNO2,WDR18
chr7	45357129	45582346	225217	north	1	C7H19orf24,C7H19orf25,CIRBP,DAZAP1,GAMT,MBD3,MUM1,NDUFS7,REEP6,RPS15
chr7	45586375	45838279	251904	north;northwest	2	ABHD17A,ATP8B3,REXO1,TCF3,UQCR11
chr7	46030870	46254947	224077	north	1	AFF4,GDF9,HSPA4,LEAP2,SHROOM1,UQCRQ,ZCCHC10
chr7	47559314	47821784	262470	north;southwest	2	SAR1B,SEC24A
chr7	47992066	48187537	195471	northwest	1	CATSPER3,PITX1
chr7	48898239	49132675	234436	north;northwest;southwest;south	4	FBXL21,LECT2,SLC25A48,TGFBI
chr7	49136308	49350285	213977	south	1	SMAD5,TRPC7
chr7	49826844	49997049	170205	north;northwest	2	SPOCK1
chr7	50670070	50951861	281791	north;northwest	2	MIR874,MYOT
chr7	50956166	51189847	233681	north;northwest	2	MYOT,NME5,PKD2L2,WNT8A
chr7	51196701	51471754	275053	north;northwest;southwest;south	4	CDC23,CDC25C,EGR1,ETF1,FAM53C,GFRA3,KIF20A,MIR2459,REEP2,SLBP2
chr7	51476325	51727698	251373	north;northwest;southwest;south	4	CTNNA1,ETF1,HSPA9
chr7	51733297	51984234	250937	north;northwest;southwest;south	4	CTNNA1,LRRTM2,SIL1
chr7	51986849	52234050	247201	north;northwest;southwest;south	4	MATR3,SIL1,SNHG4
chr7	52240425	52499466	259041	north;northwest;southwest;south	4	DNAJC18,ECSCR,MATR3,MZB1,PAIP2,SPATA24,TMEM173,UBE2D2
chr7	52502608	52836863	334255	north;northwest;southwest	3	CXXC5
chr7	52841676	53104028	262352	north;northwest;southwest;south	4	CYSTM1,IGIP,PURA
chr7	53107671	53401992	294321	north;northwest;southwest	3	CYSTM1,HBEGF,PFDN1,SLC4A9
chr7	54214941	54413989	199048	north	1	FCHSD1,HDAC3,PCDHGA8,PCDHGB4,PCDHGC3,RELL2
chr7	59353807	59590759	236952	north	1	LARS,POU4F3,RBM27
chr7	60893116	61019819	126703	northwest	1	JAKMIP2
chr7	62211571	62428280	216709	north;northwest;southwest;south	4	ADRB2
chr7	62431361	62577138	145777	northwest;southwest	2	ABLIM3
chr7	63567466	63947705	380239	northwest	1	CAMK2A,CD74,MIR2461,NDST1,RPS14,SLC6A7
chr7	72789292	72998355	209063	northwest;southwest;south	3	EBF1,RNF145,UBLCP1
chr7	92215864	92513476	297612	south	1	CETN3,LYSMD3,MBLAC2,POLR3G
chr8	20855	334739	313884	north;south	2	HIATL1
chr8	6815695	7010343	194648	south	1	NOT_FOUND
chr8	29537101	29714938	177837	south	1	ZDHHC21
chr8	39066884	39364601	297717	southwest;south	2	NOT_FOUND
chr8	39367260	39553639	186379	southwest;south	2	CD274,PDCD1LG2,PLGRKT
chr8	39556440	39842888	286448	northwest;southwest;south	3	INSL6,PLGRKT
chr8	46708059	46948807	240748	south	1	KLF9,MIR2285I
chr8	47907300	48119042	211742	north	1	NOT_FOUND
chr8	53838076	53976475	138399	southwest	1	GNA14,GNAQ
chr8	54337221	54507754	170533	north;northwest;southwest;south	4	PSAT1
chr8	56116690	56276053	159363	south	1	NOT_FOUND
chr8	58646067	58859862	213795	north;northwest;southwest	3	NOT_FOUND
chr8	58868173	59046585	178412	north;northwest;southwest	3	NOT_FOUND
chr8	59049464	59280753	231289	northwest;southwest	2	MIR2887-1,MIR2887-2,MIR2904-1,MIR2904-2,MIR2904-3
chr8	59284029	59464494	180465	north;northwest;southwest	3	NOT_FOUND
chr8	59478204	59762871	284667	north;northwest;southwest	3	DNAJB5,FAM205CP,FANCG,VCP
chr8	59768925	59986906	217981	north;northwest;southwest	3	FAM214B,STOML2,UNC13B
chr8	60334817	60589007	254190	northwest;southwest	2	HINT2,NPR2,SPAG8,TMEM8B
chr8	61591463	61755734	164271	northwest	1	ZCCHC7
chr8	62774064	62883896	109832	northwest	1	NOT_FOUND
chr8	69759821	69949936	190115	north;south	2	DMTN,HR,NPM2,XPO7
chr8	73504376	73678737	174361	south	1	MIR2285AE
chr8	74837991	75051458	213467	south	1	BNIP3L,PNMA2,PPP2R2A
chr8	75054697	75187000	132303	south	1	DPYSL2
chr8	83460245	83648184	187939	north;south	2	PTCH1
chr8	83659071	83863416	204345	south	1	NOT_FOUND
chr8	84588775	84801331	212556	south	1	CDC14B,HABP4
chr8	85977251	86205872	228621	south	1	FAM120A
chr8	88256624	88430513	173889	south	1	SYK
chr8	100247261	100388737	141476	north	1	CTNNAL1,MIR32
chr8	109077847	109254917	177070	north;northwest;southwest	3	NOT_FOUND
chr9	2273454	2588804	315350	south	1	NOT_FOUND
chr9	104576959	104807894	230935	north	1	THBS2
chr9	104809821	104976395	166574	north	1	NOT_FOUND
chr9	104980513	105195355	214842	north	1	C9H6orf120,ERMARD,PHF10,TCTE3
chr10	35903883	36131687	227804	northwest	1	BUB1B,DISP2,KNSTRN,PAK6,PHGR1,PLCB2
chr10	36651075	36888669	237594	southwest	1	CHP1,INO80
chr10	37149852	37471285	321433	northwest;southwest	2	EHD4,JMJD7,MGA,PLA2G4B
chr10	53146263	53406835	260572	north;southwest	2	TCF12
chr10	53411620	53781326	369706	north	1	TCF12
chr10	54815809	55110153	294344	north	1	DYX1C1,LOC788201,MIR628,PIGB
chr10	70847451	71007933	160482	north	1	ARID4A,TIMM9
chr10	72960396	73248329	287933	north	1	MNAT1
chr10	82874562	83114112	239550	south	1	NOT_FOUND
chr10	83115156	83280760	165604	northwest	1	NOT_FOUND
chr10	89766139	89867868	101729	northwest;southwest	2	SPTLC2
chr11	32975653	33211386	235733	north	1	NRXN1
chr11	56374022	56768275	394253	northwest	1	REG3A,REG3G
chr11	62188478	62463712	275234	north;southwest	2	UGP2,VPS54
chr11	71559259	71875910	316651	south	1	BRE,RBKS
chr11	73681284	73906883	225599	northwest;southwest	2	DTNB
chr11	88335222	88559569	224347	south	1	NOT_FOUND
chr11	88576392	88778399	202007	northwest	1	ID2
chr11	94879992	95196709	316717	north	1	DENND1A,LHX2
chr11	98413202	98627167	213965	southwest;south	2	AK1,CDK9,DPM2,ENG,FAM102A,FPGS,PIP5KL1,SH2D3C,ST6GALNAC4,ST6GALNAC6,TOR2A,TTC16
chr12	2192168	2270760	78592	northwest	1	DIAPH3
chr12	19515523	19770118	254595	northwest	1	KCNRG,MIR15A,MIR16A,MIR3613A,MIR3613B,TRIM13
chr12	25976750	26272690	295940	north;northwest;southwest;south	4	MAB21L1
chr12	26278486	26612825	334339	north;southwest;south	3	NOT_FOUND
chr12	27876916	28053602	176686	south	1	STARD13
chr12	28225923	28501202	275279	northwest;southwest;south	3	NOT_FOUND
chr12	28502095	28759595	257500	northwest;southwest	2	N4BP2L1,ZAR1L
chr12	29083909	29372191	288282	southwest;south	2	RXFP2
chr12	29628048	29753360	125312	southwest	1	MIR2299
chr12	31439132	31727027	287895	southwest;south	2	FLT1,POMP,SLC46A3
chr12	35415225	35632538	217313	northwest;southwest	2	FGF9
chr12	35643452	35876340	232888	northwest;southwest;south	3	FGF9,MICU2,MRPL57,SAP18,SKA3,ZDHHC20
chr12	35879903	36114562	234659	southwest;south	2	IFT88,N6AMT2,XPO4
chr12	36122549	36304552	182003	south	1	CRYL1,IFT88
chr12	36906938	37185019	278081	south	1	NOT_FOUND
chr12	37825096	38141849	316753	southwest;south	2	NOT_FOUND
chr12	38142695	38574972	432277	south	1	NOT_FOUND
chr13	18328774	18552852	224078	north	1	APBB1IP,CCNY,CREM
chr13	20215298	20477075	261777	north;northwest;southwest	3	ITGB1
chr13	22683318	22909019	225701	south	1	MIR2285D
chr13	22917532	23215544	298012	north;northwest;southwest;south	4	NOT_FOUND
chr13	23218699	23598256	379557	north;northwest;southwest	3	NOT_FOUND
chr13	23603861	23848421	244560	north	1	BMI1,COMMD3,SPAG6
chr13	35214935	35396661	181726	north	1	KIAA1462
chr13	39575573	39692017	116444	northwest	1	NOT_FOUND
chr13	39696514	39873569	177055	northwest;southwest	2	MIR2305,RIN2
chr13	39877641	40103153	225512	northwest;southwest	2	CRNKL1,NAA20
chr13	40847700	41010304	162604	northwest	1	KIZ,XRN2
chr13	41013414	41215254	201840	northwest	1	NKX2-2,XRN2
chr13	42267393	42404062	136669	north	1	NXT1
chr13	42600098	42797560	197462	north	1	SYNDIG1
chr13	44787497	45050125	262628	northwest;southwest	2	KLF6
chr13	49137401	49444210	306809	north;southwest	2	NOT_FOUND
chr13	49457188	49707937	250749	southwest	1	BMP2
chr13	49716110	49997550	281440	northwest;southwest	2	NOT_FOUND
chr13	50760200	51056217	296017	southwest	1	NOT_FOUND
chr13	51681376	51982500	301124	southwest	1	AP5S1,C13H20orf27,CDC25B,HSPA12B,MAVS,MIR103-2,RNF24,SPEF1
chr13	52309239	52561441	252202	northwest;southwest	2	C13H20orf194,DDRGK1,FASTKD5,ITPA,PROSAPIP1,SLC4A11,UBOX5
chr13	52564826	52785121	220295	southwest	1	AVP,MRPS26,OXT,PTPRA,VPS16
chr13	54176457	54449276	272819	north;northwest;southwest;south	4	ABHD16B,DNAJC5,MIR1388,MYT1,NPBWR2,PRPF6,RGS19,SAMD10,SOX18,TCEA2,TPD52L2
chr13	54453339	54769952	316613	north;northwest;southwest	3	ARFGAP1,ARFRP1,C13H20orf195,CHRNA4,EEF1A2,GMEB2,PPDPF,PTK6,RTEL1,SRMS,STMN3,TNFRSF6B,ZBTB46,ZGPAT
chr13	54773778	54953779	180001	north;northwest;southwest	3	GID8,MIR124B,SLC17A9,YTHDF1
chr13	55626959	55777859	150900	northwest;southwest	2	NOT_FOUND
chr13	57643641	57876144	232503	northwest;southwest	2	ATP5E,SLMO2,TUBB1
chr13	57880542	58202774	322232	north;northwest;southwest	3	CTSZ,GNAS,MIR296,MIR6123
chr13	67365382	67548346	182964	north	1	CTNNBL1,TTI1,VSTM2L
chr13	78520784	78775869	255085	south	1	RNF114,SNAI1,SPATA2
chr13	79008708	79243301	234593	south	1	NOT_FOUND
chr14	1549928	1901893	351965	northwest;southwest;south	3	ADCK5,ARHGAP39,C14H8orf82,CPSF1,CYHR1,DGAT1,FOXH1,GPT,HSF1,KIFC2,LRRC14,LRRC24,MFSD3,MIR1839,MIR2308,MROH1,PPP1R16A,RECQL4,SCRT1,SLC39A4,SLC52A2,TONSL,VPS28
chr14	2198215	2445935	247720	north;northwest	2	CCDC166,EEF1D,GSDMD,MAPK15,MIR193A-2,NAPRT,PYCRL,TSTA3
chr14	8137552	8297461	159909	south	1	NOT_FOUND
chr14	11699533	11822215	122682	north	1	FAM49B
chr14	11824739	11940488	115749	north	1	FAM49B,GSDMC
chr14	11941774	12142056	200282	north	1	NOT_FOUND
chr14	12363046	12572390	209344	north;northwest	2	NOT_FOUND
chr14	12768118	12964109	195991	southwest	1	NOT_FOUND
chr14	13882578	14097206	214628	north	1	NOT_FOUND
chr14	22517710	22755006	237296	north	1	PCMTD1
chr14	24769617	25001051	231434	northwest;southwest	2	LYN,RPS20,TGS1
chr14	32728091	32948744	220653	southwest;south	2	ADHFE1,C14H8orf46,MYBL1
chr14	35929750	36123859	194109	northwest;southwest;south	3	NOT_FOUND
chr14	36127399	36347966	220567	southwest;south	2	NOT_FOUND
chr14	36657839	36850201	192362	north;northwest;southwest	3	NOT_FOUND
chr14	36853296	37148314	295018	northwest;southwest	2	NOT_FOUND
chr14	39210186	39387963	177777	north	1	LY96,TCEB1,TMEM70,UBE2W
chr14	40886879	41062112	175233	north	1	HNF4G
chr14	41375471	41597940	222469	north	1	NOT_FOUND
chr14	41866068	42072015	205947	southwest	1	ZFHX4
chr14	42076516	42284878	208362	north	1	ZFHX4
chr14	42288828	42458925	170097	north	1	PEX2
chr14	45210299	45453734	243435	northwest	1	MRPS28
chr14	46255387	46444557	189170	north;northwest;southwest	3	NOT_FOUND
chr14	46447304	46658037	210733	north	1	FABP5
chr14	47067759	47286736	218977	north;northwest	2	COLEC10,MAL2
chr14	50704166	50901931	197765	northwest;southwest;south	3	TRPS1
chr14	57893380	58236302	342922	southwest;south	2	EMC2
chr14	58241211	58512237	271026	south	1	EIF3E
chr15	13001427	13306889	305462	northwest	1	NOT_FOUND
chr15	14749570	15059278	309708	north	1	CEP57,FAM76B
chr15	29658327	29953102	294775	north	1	ARCN1,DDX6,IFT46,PHLDB1,TMEM25,TREH,TTC36,UPK2
chr15	29977058	30292870	315812	north	1	ABCG4,BCL9L,C2CD2L,CCDC84,CXCR5,DPAGT1,H2AFX,HINFP,HMBS,HYOU1,NLRX1,RPS25,SLC37A4,TRAPPC4,UPK2,VPS11
chr15	30298349	30514604	216255	north	1	C1QTNF5,CCDC153,MCAM,MFRP,PDZD3,THY1,USP2
chr15	46101560	46339205	237645	north	1	RBMXL2
chr15	48546765	48668020	121255	northwest	1	TRIM6
chr15	59492755	59773732	280977	north	1	KIF18A,METTL15
chr16	40384538	40662151	277613	north	1	DNM3,MIR199A-1,MIR214,MIR3120
chr16	41542076	41891671	349595	north;northwest;southwest;south	4	TNFSF18,TNFSF4
chr16	42071727	42317253	245526	south	1	VPS13D
chr16	44100460	44287521	187061	northwest	1	UBE4B
chr16	44291131	44636778	345647	north;northwest;southwest	3	CTNNBIP1,NMNAT1,UBE4B
chr16	44639909	44883644	243735	north;northwest;southwest	3	PIK3CD,TMEM201
chr16	46159900	46396025	236125	south	1	ERRFI1,PARK7,TNFRSF9
chr16	49908880	50098999	190119	north	1	AJAP1
chr16	50400885	50542791	141906	north	1	C16H1orf174,DFFB,LRRC47,MIR2320
chr16	50543681	50792635	248954	north	1	LRRC47,MIR551A,SMIM1,TPRG1L,WRAP73
chr16	51661530	51895611	234081	north;northwest;southwest	3	C16H1orf86,MIR2896,PEX10,PRKCZ,RER1
chr16	51901635	52137910	236275	north;northwest;southwest	3	GABRD,GNB1,PRKCZ
chr16	52143762	52474552	330790	north;northwest;southwest;south	4	ANKRD65,ATAD3A,AURKAIP1,CCNL2,CDK11B,DVL1,GNB1,MMP23B,MRPL20,MXRA8,NADK,SDF4,SLC35E2,SSU72,TMEM240,TMEM88B,UBE2J2,VWA1
chr16	52479987	52750396	270409	north;northwest;southwest	3	ACAP3,C16H1orf159,CPSF3L,CPTP,DVL1,ISG15,MIR200A,MIR200B,MIR429,PERM1,SDF4,TNFRSF18,TNFRSF4
chr16	52754938	53039876	284938	north;northwest;southwest	3	FBLIM1,KLHL17,NOC2L
chr16	73481886	73711818	229932	south	1	LPGAT1,NEK2
chr16	73716594	73895966	179372	south	1	SLC30A1,TRAF5
chr16	73901718	74149214	247496	south	1	KCNH1,RCOR3,TRAF5
chr17	35629245	36438437	809192	north	1	NOT_FOUND
chr18	11307180	11628361	321181	north;south	2	VAMP2
chr18	11631491	11876950	245459	north	1	COX4I1,EMC8,VAMP2
chr18	12085032	12349533	264501	southwest	1	NOT_FOUND
chr18	14408694	14697775	289081	northwest	1	CDK10,CHMP1A,CPNE7,DPEP1,FANCA,RPL13,SPATA2L,SPG7,SPIRE2
chr18	46373795	46503439	129644	northwest	1	ATP4A,DMKN,GAPDHS,TMEM147
chr18	51122954	51310047	187093	south	1	CEACAM1,CNFN,LIPE,PAFAH1B3,PRR19,TMEM145
chr18	53271205	53629164	357959	northwest;southwest;south	3	CD3EAP,CKM,ERCC1,ERCC2,FOSB,GPR4,KLC3,LOC508455,MARK4,OPA3,PPM1N,PPP1R13L,RTN2,VASP
chr19	81083	477717	396634	southwest;south	2	NOT_FOUND
chr19	21225583	21464417	238834	north	1	ABHD15,ANKRD13B,CORO6,MIR2334,MIR4523,TAOK1,TP53I13
chr19	23267912	23456225	188313	south	1	MIR22,MIR3600,PRPF8,SERPINF1,SERPINF2,SLC43A2,SMYD4,TLCD2
chr19	27545829	27858650	312821	southwest	1	ACADVL,ACAP1,CHRNB1,CLDN7,CTDNEP1,DLG4,DVL2,EIF5A,FGF11,GABARAP,GPS2,KCTD11,MIR324,NEURL4,NLGN2,PHF23,PLSCR3,POLR2A,SLC2A4,SLC35G6,SPEM1,TMEM102,TMEM256,YBX2,ZBTB4
chr19	27882070	28199207	317137	north;northwest;southwest;south	4	ATP1B2,CD68,CYB5D1,DNAH2,EFNB3,EIF4A1,FXR2,MPDU1,SAT2,SENP3,SHBG,SOX15,TMEM88,TNFSF12,TNFSF13,TP53,WRAP53
chr19	28923040	29094944	171904	south	1	MIR2284AA-3,NTN1,PIK3R6
chr19	44770011	45012321	242310	northwest;southwest;south	3	ITGA2B
chr19	46617068	46937586	320518	northwest;southwest	2	CDC27,MAPT,MYL4
chr19	47559874	47846392	286518	northwest	1	MARCH10,MRC2,TLK2
chr19	52292138	52426119	133981	northwest	1	CHMP6,RPTOR
chr20	3602570	3802621	200051	south	1	STK10
chr20	13363297	13650760	287463	north	1	ERBB2IP,MIR2285Q,MIR2285Z,SREK1
chr20	14243837	14617992	374155	north;southwest;south	3	ADAMTS6,CWC27
chr20	36917645	37156095	238450	south	1	MIR2360,NUP155,WDR70
chr20	67109002	67223518	114516	south	1	NOT_FOUND
chr20	71862651	71992748	130097	north;southwest;south	3	CCDC127,LOC529500,PDCD6,SDHA
chr21	5191	751662	746471	southwest;south	2	NDN,SNRPN,SNURF
chr21	757686	1629222	871536	southwest;south	2	NOT_FOUND
chr21	2688455	2880150	191695	south	1	NOT_FOUND
chr21	14425804	14667969	242165	south	1	NOT_FOUND
chr21	32019219	32266753	247534	north;southwest	2	ETFA,ISL2
chr21	32277971	32530146	252175	north;northwest;southwest	3	NOT_FOUND
chr22	28635957	28869621	233664	northwest	1	NOT_FOUND
chr22	30129991	30448454	318463	north	1	FOXP1,MIR1284
chr22	48470092	48622078	151986	south	1	ITIH4,MUSTN1,SFMBT1,TMEM110
chr22	48888770	49246151	357381	northwest;southwest;south	3	ALAS1,BAP1,GLYCTK,MIR135A-1,MIRLET7G,STAB1,TLR9,TNNC1,TWF2,WDR82
chr22	49246769	49506575	259806	southwest;south	2	ACY1,ALAS1,DUSP7,POC1A,RPL29
chr22	50444711	50657360	212649	south	1	CYB561D2,HYAL1,HYAL2,HYAL3,IFRD2,NPRL2,RASSF1,SEMA3B,TMEM115,ZMYND10
chr22	51310899	51585198	274299	north	1	ARIH2,C22H3orf62,C22H3orf84,CCDC36,CCDC71,DALRD3,GPX1,IMPDH2,KLHDC8B,LAMB2,MIR191,MIR425,NDUFAF3,P4HTM,QARS,QRICH1,RHOA,USP4,WDR6
chr23	51833556	52177705	344149	south	1	EXOC2,IRF4
chr24	31238523	31555588	317065	northwest	1	NOT_FOUND
chr25	26417987	26752172	334185	northwest;southwest	2	ALDOA,ASPHD1,C25H16orf54,CDIPT,DOC2A,FAM57B,GDPD3,HIRIP3,INO80E,KCTD13,KIF22,MAPK3,MIR2325C,MIR2385,MVP,PAGR1,PPP4C,QPRT,SEZ6L2,TAOK2,TBX6,TMEM219,YPEL3
chr25	27177175	27505639	328464	south	1	BCKDK,BCL7C,CTF1,HSD3B7,KAT8,ORAI3,PRSS8,SETD1A,STX1B,STX4,VKORC1,ZNF629,ZNF668
chr25	42726313	42845682	119369	southwest;south	2	NOT_FOUND
chr27	18027188	18367081	339893	south	1	ASAH1,FRG1
chr28	35131194	35298240	167046	northwest	1	PPIF
chr29	45601239	45867745	266506	south	1	ADRBK1,ANKRD13D,C29H11orf86,PC,RHOD,SYT12
